# **Transmission potential of the New Corona (COVID-19) onboard the Princess Cruises Ship, 2020**

## **Authors:**

Kenji Mizumoto<sup>1,2,3</sup> Gerardo Chowell<sup>3,4</sup>

## **Affiliations:**

<sup>1</sup> Graduate School of Advanced Integrated Studies in Human Survivability, Kyoto University Yoshida-Nakaadachi-cho, Sakyo-ku, Kyoto, Japan

<sup>2</sup> Hakubi Center for Advanced Research, Kyoto University, Yoshidahonmachi, Sakyo-ku, Kyoto, Japan;

<sup>3</sup> Department of Population Health Sciences, School of Public Health, Georgia State University, Atlanta, Georgia, USA

<sup>4</sup> Division of International Epidemiology and Population Studies, Fogarty International Center, National Institutes of Health, Bethesda, USA

## **Correspondence to:**

K Mizumoto, Graduate School of Advanced Integrated Studies in Human Survivability, Kyoto University Yoshida-Nakaadachi-cho, Sakyo-ku, Kyoto, Japan

Tel: +81 75 762 2001 Fax: +81 75 762 2277

E-mail: mizumoto.kenji.5a@kyoto-u.ac.jp

## **Article type:**

Research Article

## **Word count:**

Abstract: 73

Main: 2048

**Abstract:**

Using mathematical modeling and time-series incidence data describing the trajectory of the outbreak among passengers and crew members, we characterize the transmission potential of the COVID-19 outbreak aboard the Princess Cruises Ship, January-February 2020. Probably due to the enhanced quarantine control, overall  $R_t$  decreased substantially compared to values during the early stage, but it exhibited fluctuations around the epidemic threshold, which suggests a very low probability of observing secondary outbreaks of the disease.

## Introduction

While the novel coronavirus (Covid-19) spread rapidly throughout China for several weeks since December 2019, the virus had not taken off outside China in part due to the unprecedented interventions that the Chinese government put in place. One exception is the outbreak of COVID-19 aboard the Diamond Princess Ship that was detected in early February when one of its passengers, a traveler from Hong Kong, tested positive for the novel coronavirus. The number of cases in the ship quickly surged to 454 confirmed cases by February 18, 2020. In contrast, at the time the total number of cases in Singapore, the country with the highest number of COVID-19 cases after China, was only 77 [1].

Accumulating evidence indicates that the novel coronavirus can spread widely in confined settings including hospitals [2], cruise ships [3], prisons, and churches [4-5]. In the Wuhan City, China, outbreaks inside health care settings led to the infection of hundreds of health professionals [2]. In Tokyo, Japan, most of the reported infections have been linked to a party inside a traditional wooden ship, called Yakatabune [6] while most of the infections in Korea have affected members of one church.

Understanding the transmission potential of COVID-19 in different confined settings and how it compares with that of other respiratory diseases such influenza has implications for the implementation of public health interventions. When outbreaks occur in confined settings, it is useful to investigate how the effective reproduction number changes as a result of the effects of different interventions strategies such as the quarantine imposed on travelers and crew members aboard the cruise ship in Japan. In this study we sought to characterize the transmission potential of the COVID-19 outbreak aboard the Princess Cruises Ship using mathematical modeling and time-series incidence data describing the trajectory of the outbreak among passengers and crew members.

### **Epidemiological incidence cases**

In Yokohama, Japan, an outbreak of COVID-19 is unfolding on board the Princess Cruise Ship, which has been under quarantine orders since February 5, 2020, after a former passenger of the cruise ship tested positive for the virus after disembarking in Hong Kong [3,7]. As of February 22, 2020, two days after the scheduled two-week quarantine came to an end, a total of 621 people including one quarantine officer, one

nurse and one administrative officer have tested positive for COVID-19 out of the 3,711 passengers and crew members on board. Laboratory tests by PCR have been conducted, prioritizing symptomatic or high risk groups.

Incidence curves of laboratory-confirmed symptomatic cases of COVID-19 among passengers and crew members of the outbreak unfolding aboard the Princess Cruises Ship are publicly available from the National Institute of Infectious Diseases, Japan (NIID) website [3]. Daily time series of symptomatic patients, from January 20, 2020 to February 18, 2020 were extracted. However, to reconstruct the trajectory of the epidemic, only 197 cases have dates of symptoms onset available out of 300 confirmed symptomatic cases.

Of the 103 symptomatic cases with missing onset dates, a total of the 79 cases are passengers while 24 cases are crew members. Moreover, out of the 79 passenger cases, 30 cases were reported from February 4, 2020 to February 6, 2020, 21 cases were reported from February 7, 2020 to February 14, 2020, and 28 cases were reported from February 14, 2020 to February 19, 2020. Of 24 crew member cases, 1 case was reported from February 4, 2020 to February 6, 2020, 15 cases were reported from February 7, 2020 to February 14, 2020, and 8 cases were reported from February 14, 2020 to February 19, 2020.

## Epidemiological modelling

We connected the daily incidence series with a discrete-time integral equation to describe the epidemic dynamics aboard the cruise ship. Specifically, let  $f_s$  denote the probability mass function of the serial interval of COVID-19, where the serial interval is defined as the time from illness onset in the primary case to time of illness onset in the secondary case. Then  $f_s$ , of length  $s$  days, is given by

$$f_s = F(s) - F(s-1) .$$

For  $s > 0$ ,  $F(s)$  represents the cumulative distribution function of the gamma distribution.

We characterized the expected number of new incident cases  $E[c_{i,t}]$  in health zone  $i$  at symptom onset week  $t$  as follows,

$$E[c_{i,t}] = \sum_j r_{ij,t} \sum_{s=1}^{\infty} c_{j,t-s} f_s,$$

where  $r_{ij}$  denotes the average number of cases of type  $i$  infected by a single individual of type  $j$ . Here we assume that the incidence,  $c_{i,t}$ , follows a Poisson sampling process with expected value  $E[c_{i,t}]$ .

The reproduction matrix for each type is given by

$$M_t = \begin{pmatrix} r_{11,t} & r_{12,t} \\ r_{21,t} & r_{22,t} \end{pmatrix}.$$

This matrix is referred to as a next-generation matrix (NGM) in a fully susceptible population [8]. Using this matrix, we derive the instantaneous time-dependent effective reproduction number,  $R_t$ , for the entire transmission dynamics from the largest eigenvalue of the NGM. Under the assumption that the per-contact infection probability and the generation interval are consistent over time regardless of the type of infection, the NGM quantifies the within type and inter-type patterns of transmission [9]. The sum of the value in column  $j$  is the reproduction number for a specific type  $j$ .

Serial interval estimates of COVID-19 were derived from previous studies of COVID-19, indicating that it follows a gamma distribution with the mean and SD at 7.5 and 3.4 days, respectively, based on ref. [10]. The maximum value of the serial interval was fixed at 20 days as the cumulative probability distribution of the gamma distribution up to 20 days reaches 0.991.

We estimated model parameters and made projections using a Monte Carlo Markov Chain (MCMC) method in a Bayesian framework. Point estimates and corresponding 95% credibility intervals were drawn from the posterior probability distribution. All statistical analyses were conducted in R version 3.5.2 (R Foundation for Statistical Computing, Vienna, Austria) and the 'rstan' package (No-U-Turn-Sampler (NUTS)).

## Result

The observed and estimated daily number of cases by type from day 1 to day 29 (January 20 2020–February 17, 2020) are shown in Figure 1. The total number of cases for all and by type are estimated to be 187.0 (95%CrI: 163.8, 212.3), 127.1 (95%CrI: 107.8, 148.9) and 59.6 (95%CrI: 47.3, 74.0), respectively. For comparison, the number of reported cases for all and by type were 197, 149 and 48 respectively. Percentage coverage of the 95%CrI of estimated data for observed data is 54% (15/28) for all, and 50% (14/28) and 43% (12/28) for passenger and crew, respectively.

The time-dependent reproduction number for all and by type are presented in Figure 2. For all,  $R_t$  rapidly increased at round day 15 (February 4, 2020) and peaked out with the value of 11.2 (95%CrI: 7.5, 16.2) at day 19 (February 7, 2020).  $R_t$  by passenger presented a similar pattern with the value of 12.1 (95%CrI: 8.2, 17.2) at day 19 (February 7, 2020), while  $R_t$  by Crew only shows fluctuation without a big surge pattern, with the largest value being 1.56 (95%CrI: 0.07, 7.55) at day 23 (February 11, 2020).

Distributions of median  $R_t$  for entire study period for overall, for type and by each transmission route are shown in Figure 3. Median  $R_t$  are 5.8 (95%CrI: 0.6-11.0),



6.1 (95%CrI: 0.5, 11.8), 0.9 (95%CrI: 0.3, 1.5) for overall and by type (passenger, crew).

Examining inter-type and within-type transmission,  $R_t$  greatly varies in each

transmission route: 5.6 (95%CrI: 0.3, 10.9) for passenger to passenger, 0.6 (95%CrI:

0.1, 1.1) for passenger to crew, 0.5 (95%CrI: 0.2, 0.8) for crew to passenger, 0.5

(95%CrI: 0.3, 0.8) for crew to crew. Target vaccination coverage to contain the

outbreak in this confined setting were 91% and 94% from the maximum value of 50

percentile distribution and 97.5percentile distribution, respectively.

Our latest estimate of the overall  $R_t$  is 0.35 (95%CrI: 0.02, 2.19), with 1% of  $R_t$

estimates lying above the epidemic threshold of 1.0. Passenger and crew also have total

(within-type and inter-type)  $R_t$  values largely below epidemic threshold, with only a

small percentage of 0% and 9% above the epidemic threshold, respectively (Table 1).

Summary of test positive COVID-19 cases by age group and symptom status

onboard the Princess Cruises Ship is illustrated in Table 2. A total of 531 people have

tested positive as of February 5, 2020. Out of 531 cases, three was aged 0-19 years, 117

were aged 20-58 years and 411 were aged 60 years and older. The crude asymptomatic

ratio, the proportion of asymptomatic infections among all the infections, 66.7%

(95%Confidence Interval (95%CI): 9.4%, 99.1%) for aged 0-19 years, 30.8% (95%CI:

22.6%, 40.0%) for aged 20-58 years and 52.8% (95%CI: 47.9%, 57.5%) for aged 60 years and older (95%CI is based on binomial distribution).

## Discussion

This is the first paper to assess the transmission potential of the COVID-19 outbreak that unfolded aboard the Diamond Princess Ship, January-February 2020. Probably due to the enhanced quarantine control, overall  $R_t$  decreased substantially compared to values during the early stage, but it exhibited fluctuations around the epidemic threshold, which prolonged the outbreak.

Our results indicate that  $R_t$  declined substantially relative to values during the early phase of the outbreak, which is likely explained by the enhanced quarantine measure implemented by the Japanese government since February 5 [Japan. quarantine]. Our latest overall estimate of  $R_t$  takes 0.35 (95%CrI: 0.02, 2.19), with 2% of  $R_t$  estimates lying above the epidemic threshold of 1.0, suggesting a low probability of observing a subsequent major outbreak.

Our findings indicate that the passenger-to-passenger transmission route dominated the transmission dynamics aboard the ship. The rapid increase in the overall  $R_t$  from day 12 (February 3, 2020) to day 19 (February 7, 2020) is greatly influenced by the increase in

passenger-to-passenger transmission, and this time period covers the time lag between February 1, 2020 when the index COVID-19 case was reported and February 5, 2020 when the Japanese government requested the passengers to stay inside their cabin after the detection of a cluster of test positive cases [3, 11]. Soon after the quarantine, the overall  $R_t$  and  $R_t$  by passenger followed a downward trend, while  $R_t$  by crew maintained a steady level and only started to decline on day 25 (February 13, 2020). This is consistent with the fact that passengers staying inside their cabin rapidly declined the passenger-to-passenger transmission route except for their interaction with cabin mates. Indeed, the proportion of secondary infection inside the cabin went on an upward trend from 7% (1/15) on February 6, 43% (3/7) on February 10, 2020 to 100% (1/1) on February 14, 2020 [3]. Thus, a high proportion of symptomatic cases after the quarantine gradually shifted from largely passenger cases to crew cases. Indeed, crews had to continue to work despite the presence of exposed risks, particularly for service delivery to the isolated passengers. The distribution of the median  $R_e$  by transmission route suggests that other transmission routes also contributed to this outbreak to some extent (Figure 3). Taking into accounting the fact that not only one quarantine officer and one nurse, but also an administrative officer contracted the disease, the infection risk continued up to some extent inside the Ship.

As for the crude asymptomatic ratios by age groups, they appear to be different between age group, but these crude ratios are severely influenced at the time of specimen collection [13]. For further investigation, the time of specimen collection needs to be shared.

Several limitations should be listed. First, a total of 103 laboratory-confirmed symptomatic cases with unknown onset dates were not incorporated in our study.

Although the high proportion of unavailable data (34% (103/300)) led to a downward bias in transmission potential, our estimates still point to high transmission potential of COVID-19 inside confined settings. Second, it is possible that reporting delay could have influenced our latest estimates of the effective reproduction number. In fact, the US government sent a chartered flight to transport the American passengers on board the ship, and after disembarkation 14 passengers tested positive for the disease [12] on February 16, 2020. This also contributes to a downward bias although the number of cases does not exceed the peak of the outbreak and supports the overall premise of our study on the potent transmissibility of COVID-19 in confined settings.

The most recent estimate of the effective reproduction number of the ongoing COVID-19 epidemic on board the Diamond Princess Ship is largely below the epidemic

threshold of 1.0, which suggests a very low probability of observing secondary outbreaks of the disease.

## REFERENCES

1. WHO, World Health Organization, Coronavirus disease 2019 (COVID-19), Situation Report -29. Available from [https://www.who.int/docs/default-source/coronaviruse/situation-reports/20200218-sitrep-29-covid-19.pdf?sfvrsn=6262de9e\\_2](https://www.who.int/docs/default-source/coronaviruse/situation-reports/20200218-sitrep-29-covid-19.pdf?sfvrsn=6262de9e_2)
2. Nectar Gan, Natalie Thomas and David Culver, CNN. Over 1,700 frontline medics infected with coronavirus in China, presenting new crisis for the government. February 14, 2020. Available from: <https://edition.cnn.com/2020/02/13/asia/coronavirus-health-care-workers-infected-intl-hnk/index.html> [Accessed February 24, 2020]
3. National Institute of Infectious Disease, Japan (NIID) Field Briefing: Diamond Princess COVID-19 Cases. 19 FEBRUARY 2020. Available from <https://www.niid.go.jp/niid/en/2019-ncov-e/9407-covid-dp-fe-01.html>
4. NPR. Coronavirus Found In China Prisons, As Cases Spike In South Korea. February 21, 2020 Available from <https://www.npr.org/2020/02/21/808002924/coronavirus-found-in-china-prisons-as-cases-spike-in-south-korea> [Accessed February 24, 2020]
5. The Guardian. Nemo Kim in Daegu. Sun 23 Feb 2020. 'It's ruining everyone': eerie quiet reigns in coronavirus-hit South Korean city. Available from <https://www.theguardian.com/world/2020/feb/23/its-ruining-everyone-coronavirus-hit-south-korean-city-daegu> [Accessed February 24, 2020]
6. NHK News Web. February 16, 2020. Available from <https://www3.nhk.or.jp/news/html/20200216/k10012288171000.html> [Accessed February 24, 2020] [In Japanese]
7. Minister of Health, Labour and Welfare, Japan. Available from [https://www.mhlw.go.jp/stf/seisakunitsuite/bunya/0000164708\\_00001.html](https://www.mhlw.go.jp/stf/seisakunitsuite/bunya/0000164708_00001.html) [In Japanese]

8. Diekmann, O., J.A.P. Heesterbeek, and M.G. Roberts, The construction of next-generation matrices for compartmental epidemic models. 2010. p. 873-885.
9. Mizumoto K, Tariq A, Roosa K, Kong J, Yan P, Chowell G. Euro Surveill. Spatial variability in the reproduction number of Ebola virus disease, Democratic Republic of the Congo, January-September 2019.2019;24. doi: 10.2807/1560-7917.ES.2019.24.42.1900588.
10. Li Q1, Guan X, Wu P, Wang X, Zhou L, Tong Y, Ren R, et al. Early Transmission Dynamics in Wuhan, China, of Novel Coronavirus-Infected Pneumonia. N Engl J Med. 2020. doi: 10.1056/NEJMoa2001316.
11. Kumamotonichinichishinbun. February 21, 2020. Available from <https://kumanichi.com/column/syasetu/1363649/> [Accessed February 24, 2020] [In Japanese]
12. The New York Times. U.S. Passengers Evacuate Quarantined Cruise Ship in Japan. February 16, 2020. Available from <https://www.nytimes.com/2020/02/16/world/asia/coronavirus-japan-cruise-americans.html>
13. Mizumoto K, Kagaya K, Zarebski A, Chowell G. Estimating the Asymptomatic Ratio of 2019 Novel Coronavirus onboard the Princess Cruises Ship, 2020. Submitted.

**Figure 1. Observed and estimated number of the New Coronavirus (COVID-19) cases by type, onboard the Princess Cruises ship, 2020 (n = 197)**

(A) - (B) Comparison of observed (grey) and predicted (black) daily numbers of new cases by type. Black dots shows crude case fatality ratio, and light and dark indicates 95% and 50% credible intervals for posterior estimates, respectively. Day 1 on horizontal axis corresponds to January 20, 2020.

**Figure 2. Time-dependent effective reproduction number of COVID-19 onboard the Princess Cruises ship, 2020**

The overall effective reproduction number were calculated from the dominant eigenvalue of next-generation matrix. Light and dark indicates 95% and 50% credible intervals for posterior estimates, respectively. Day 1 on horizontal axis corresponds to January 20, 2020. Horizontal grey dashed line shows the reproduction number at 1.0 for reference, below which the epidemic goes to decline.

**Figure 3. Distribution of median effective reproduction number for overall and by transmission route, onboard the Princess Cruises Ship, 2020**

P: Passenger, C: Crew

## Tables

Table 1 – The latest estimate of median effective reproduction number and fraction of the density of  $R$  above the threshold of 1.0.

|           |                                              | Range                                  | Percentage over 1.0 |
|-----------|----------------------------------------------|----------------------------------------|---------------------|
| All       |                                              | 0.35 (95%CrI <sup>§</sup> :0.02, 2.19) | 2%                  |
| Passenger | Total <sup>‡</sup>                           | 0.19 (95%CrI: 0.00, 1.26)              | 0%                  |
|           | Within <sup>¶</sup> (Passenger to Passenger) | 0.06 (95%CrI: 0.00, 0.73)              | 0%                  |
|           | Inter (Passenger to Crew)                    | 0.10 (95%CrI: 0.00, 1.04)              | 0%                  |
|           |                                              |                                        |                     |
| Crew      | Total                                        | 0.30 (95%CrI: 0.00, 3.84)              | 9%                  |
|           | Within (Crew to Crew)                        | 0.15 (95%CrI: 0.00, 1.92)              | 1%                  |
|           | Inter (Crew to Passenger)                    | 0.24 (95%CrI: 0.00, 2.17)              | 2%                  |

<sup>§</sup>CrI: 95% credibility intervals (CrI)

<sup>‡</sup>Total transmission includes within-type and inter-type transmission



Table 2 – Summary of test positive COVID-19 cases by age group and symptom status onboard the Princess Cruises Ship.

| Age group | Symptomatic cases | Asymptomatic cases* | Total | Crude asymptomatic ratio <sup>‡</sup> | Persons aboard <sup>§</sup> |
|-----------|-------------------|---------------------|-------|---------------------------------------|-----------------------------|
| 0-9       | 0                 | 1                   | 1     | 100%<br>(95% CI: 2.5%, 100%)          | 16                          |
| 10-       | 1                 | 1                   | 2     | 50.0%<br>(95% CI: 1.3%, 98.7%)        | 23                          |
| 20-       | 18                | 2                   | 20    | 10.0%<br>(95% CI: 1.2, 31.7%)         | 347                         |
| 30-       | 18                | 5                   | 23    | 21.7%<br>(95% CI: 7.5%, 43.7%)        | 429                         |
| 40-       | 18                | 7                   | 25    | 28.0%<br>(95% CI: 12%, 49.4%)         | 333                         |
| 50-       | 27                | 22                  | 49    | 44.9%<br>(95% CI: 30.1%, 59.8%)       | 398                         |
| 60-       | 73                | 56                  | 129   | 43.4%<br>(95% CI: 2.5, 100%)          | 924                         |
| 70-       | 92                | 136                 | 228   | 59.6%<br>(95% CI: 53.0%, 66.1%)       | 1015                        |
| 80-       | 27                | 25                  | 52    | 48.1%<br>(95% CI: 34.0%, 62.3%)       | 215                         |
| 90-       | 2                 | 0                   | 2     | 0%<br>(95% CI: 2.5%, 84.2%)           | 11                          |

<sup>§</sup> As of February 5, 2020

<sup>‡</sup> Proportion of asymptomatic cases among all the cases. CI: Confidence Interval (CI) is based on binomial distribution

\* Symptom status is based on the information at the time of specimen collection. There is a possibility that a fraction of asymptomatic cases develop symptom.

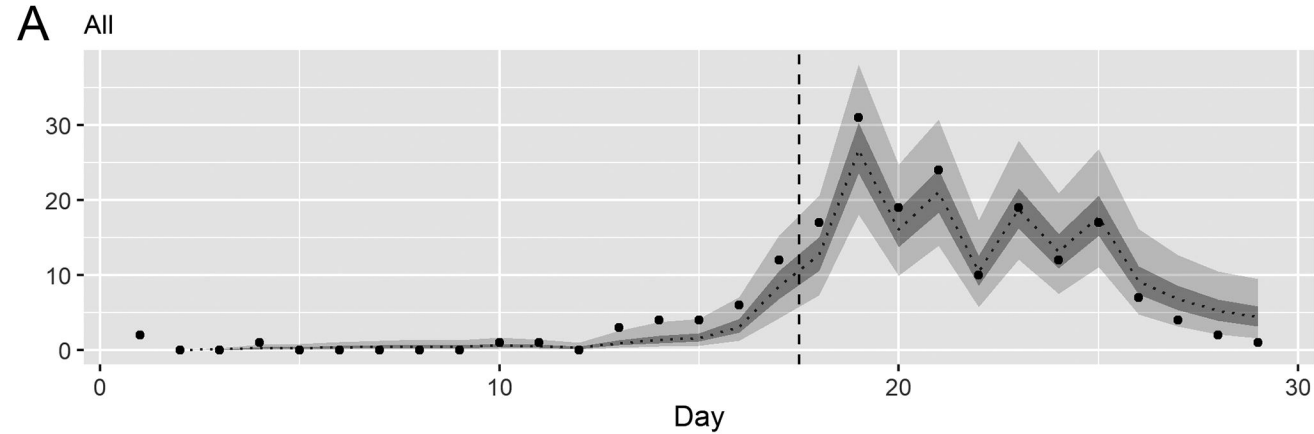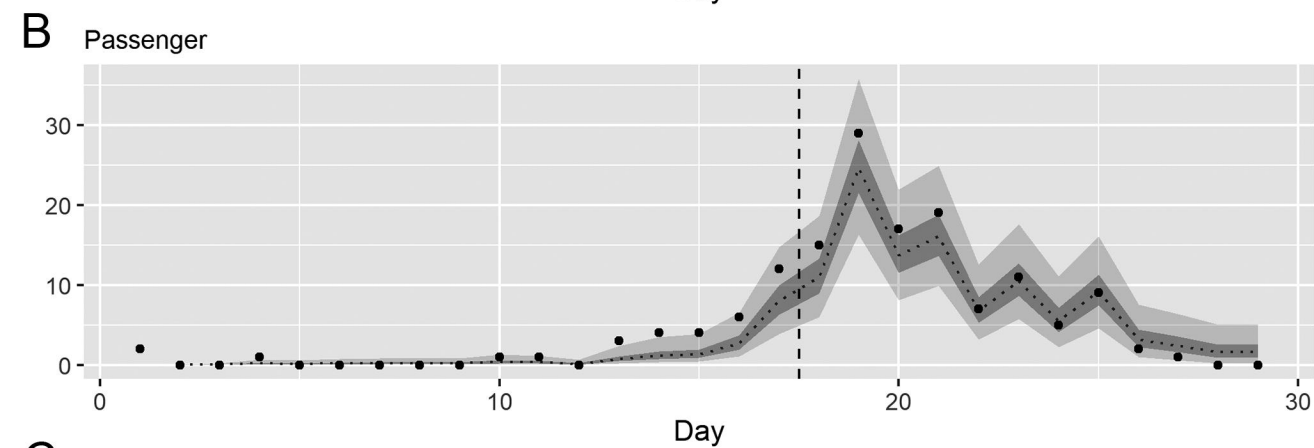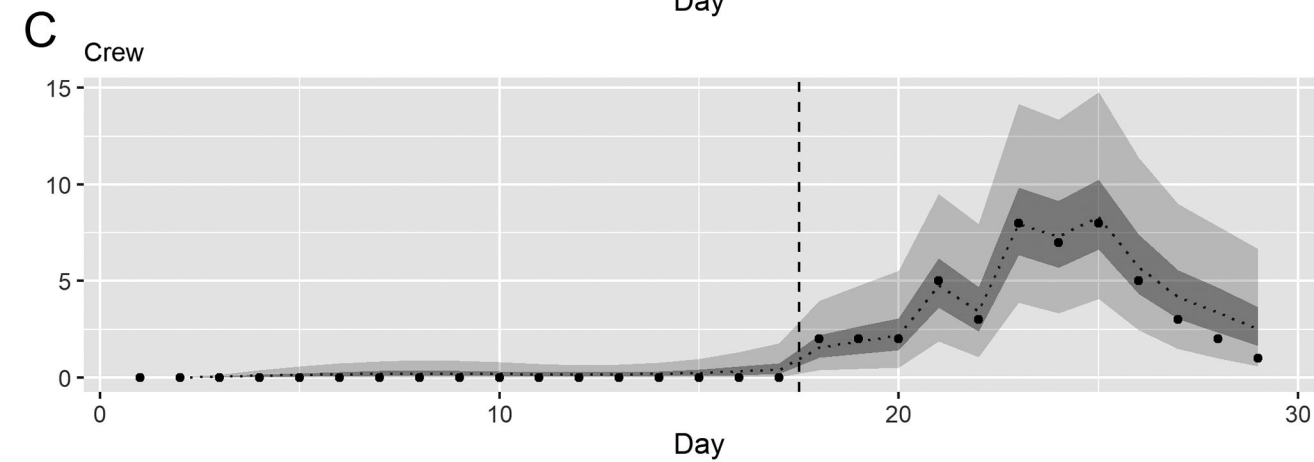

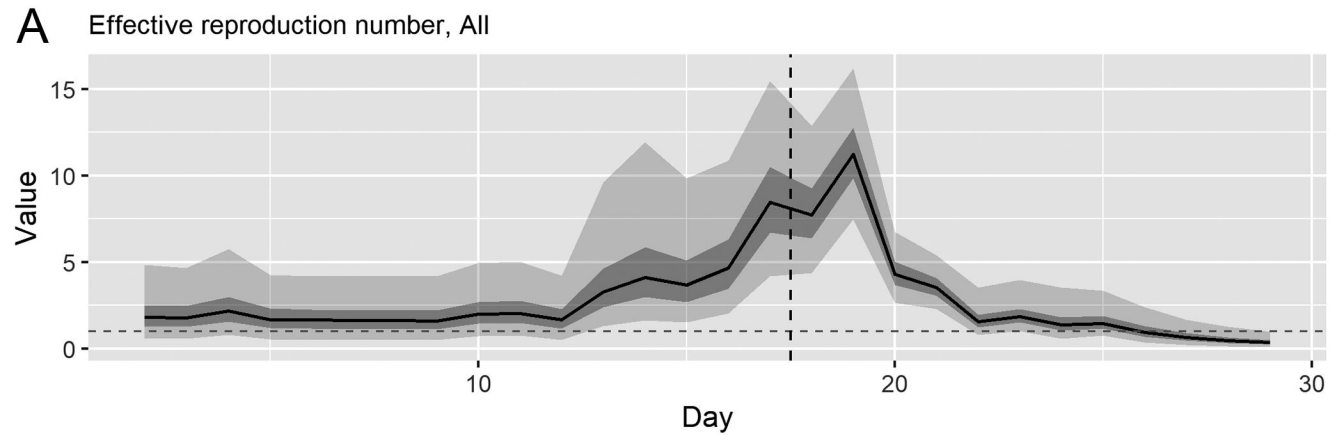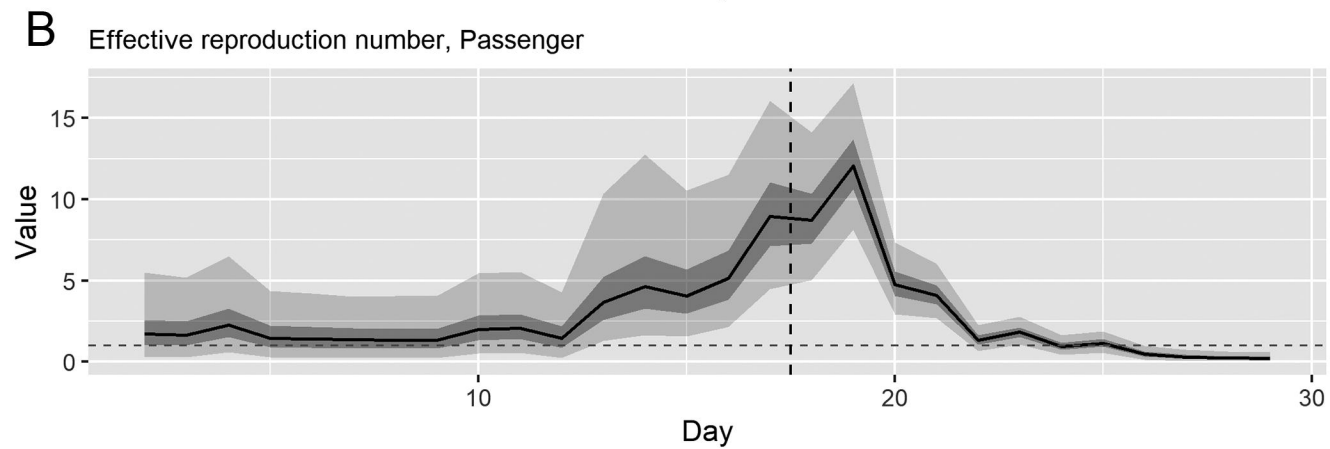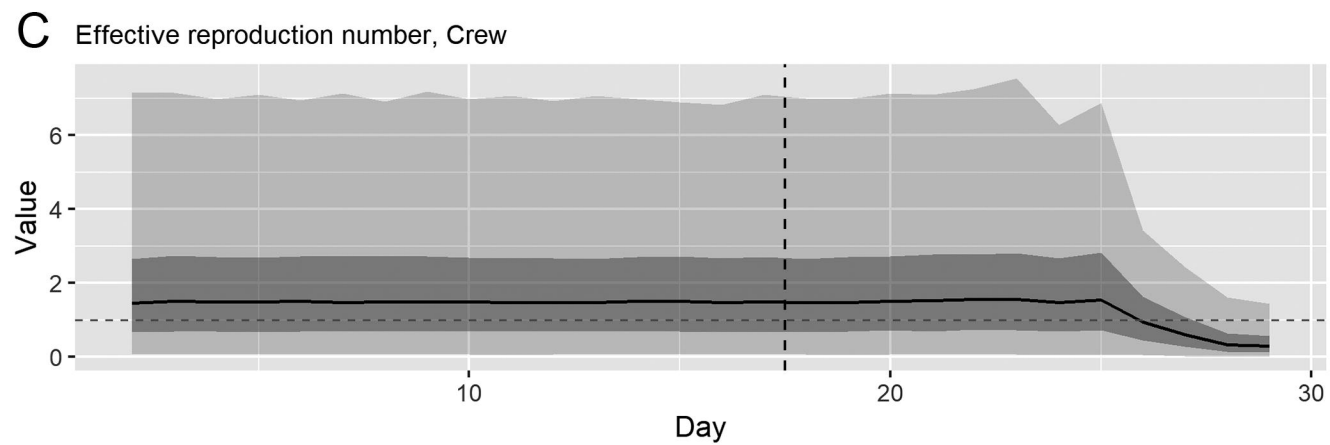

Distribution of median Re by transmission route

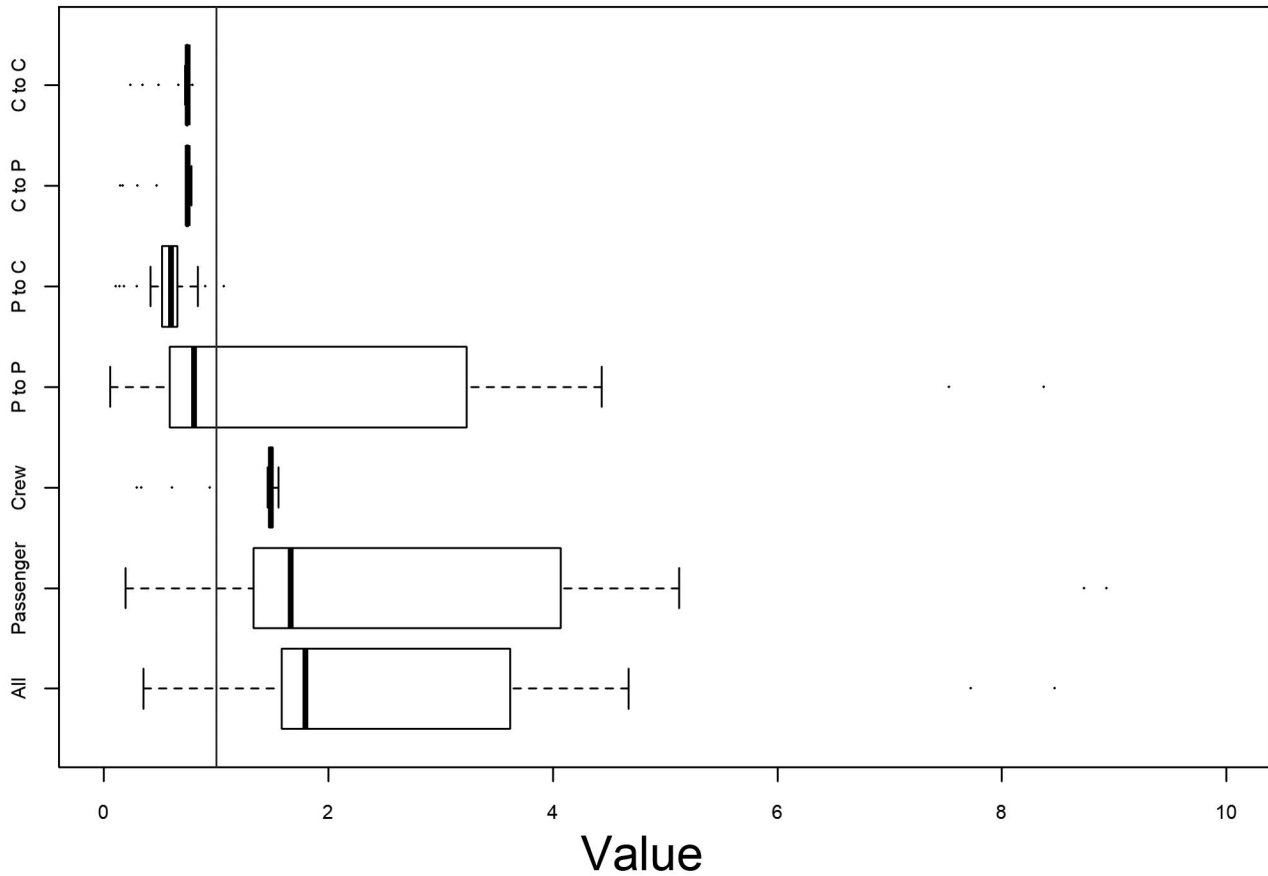

Source: https://www.medrxiv.org/content/10.1101/2020.02.24.20027649v1.full.pdf
